# Supplementary material
Source: PubMed Central journal article supplement (PMC4959216)
Supplement: AEM.00463-16_zam999117269so1.pdf [file AEM.00463-16_zam999117269so1.pdf]

**Figure S1.**

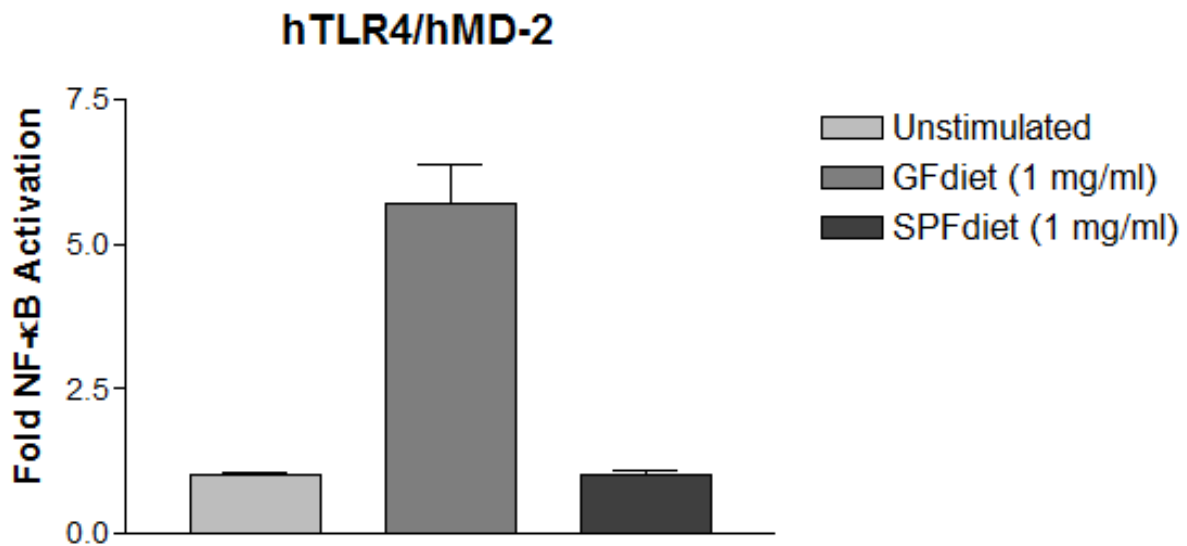

**Fig S1. Related to Fig 1. GF diet but not SPF diet elicits TLR4 Activation.** Recombinant TLR4 activity was measured using a HEK293 luciferase reporter assay. The relative abilities of SPF diet and GF diet to activate TLR4 were compared. The results were plotted as the mean fold induction ( $\pm$  standard deviation) of triplicate determinations relative to the unstimulated control.

**Figure S2A.**

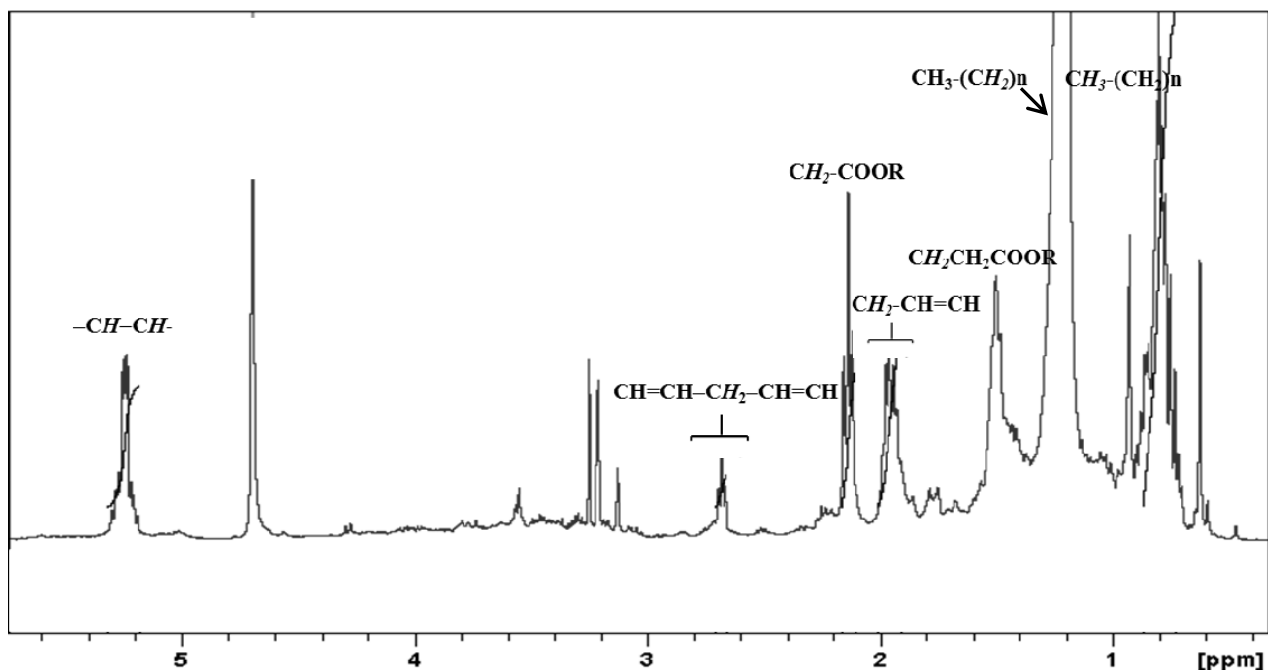

**Fig S2A. Part of the  $^1\text{H}$  NMR spectrum of the purified lipid extract of GF feces showing  $^1\text{H}$  signals of fatty acid residues.** The lipid extract was purified ToyoPearl HW- 40 column and fraction 1 was used for  $^1\text{H}$  NMR analysis. The signals for protons of both saturated and unsaturated fatty acid residues are indicated in italics and assigned as shown in Table S2.

**Figure S2B.**

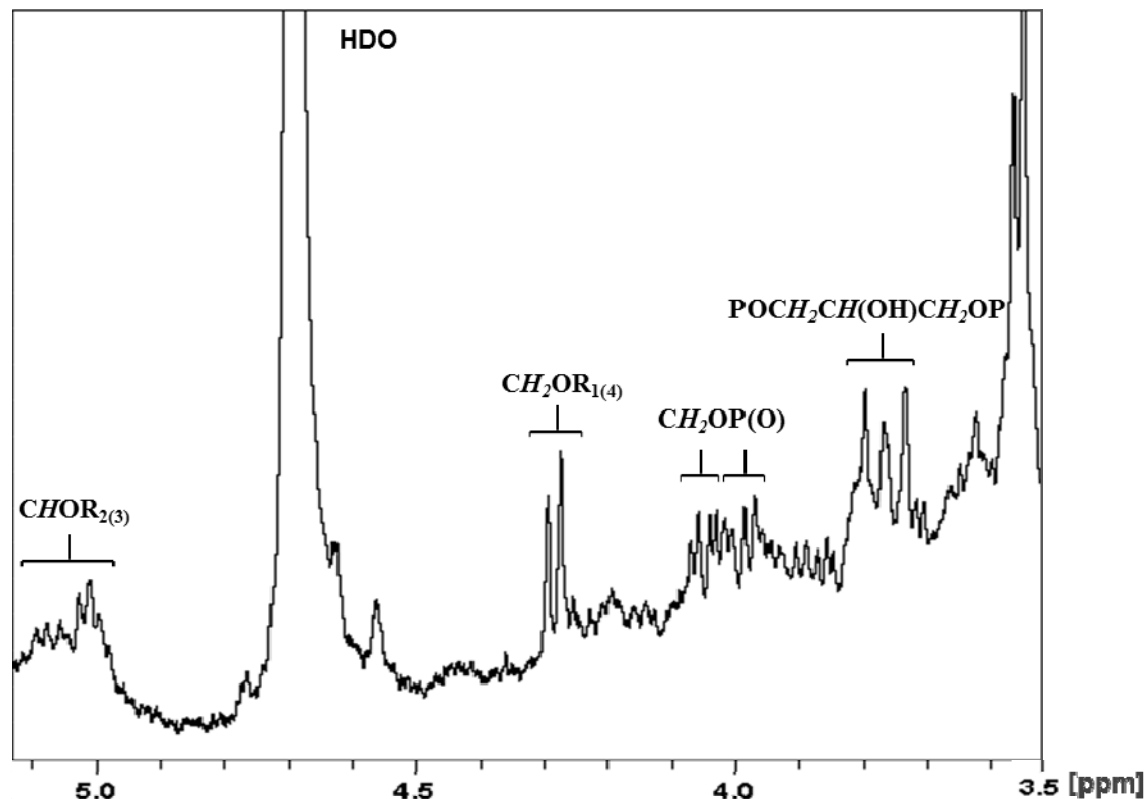

**Fig S2B. Related to Fig S2A and Fig 4E. Part of the <sup>1</sup>H NMR spectrum of the purified lipid extract of GF feces which shows the signals for protons of the central and side chain glycerol residues of cardiolipin.**

Signals for protons of the side chain glycerol residues and of the central glycerol residue of cardiolipin are indicated in italics. R<sub>1</sub>- R<sub>4</sub> represent fatty acids residues attached to the side chain glycerol moieties (see Figure 4E). The <sup>1</sup>H chemical shifts and vicinal coupling constants <sup>3</sup>J<sub>H,H</sub> are shown in Table 1.

**Figure S3.**

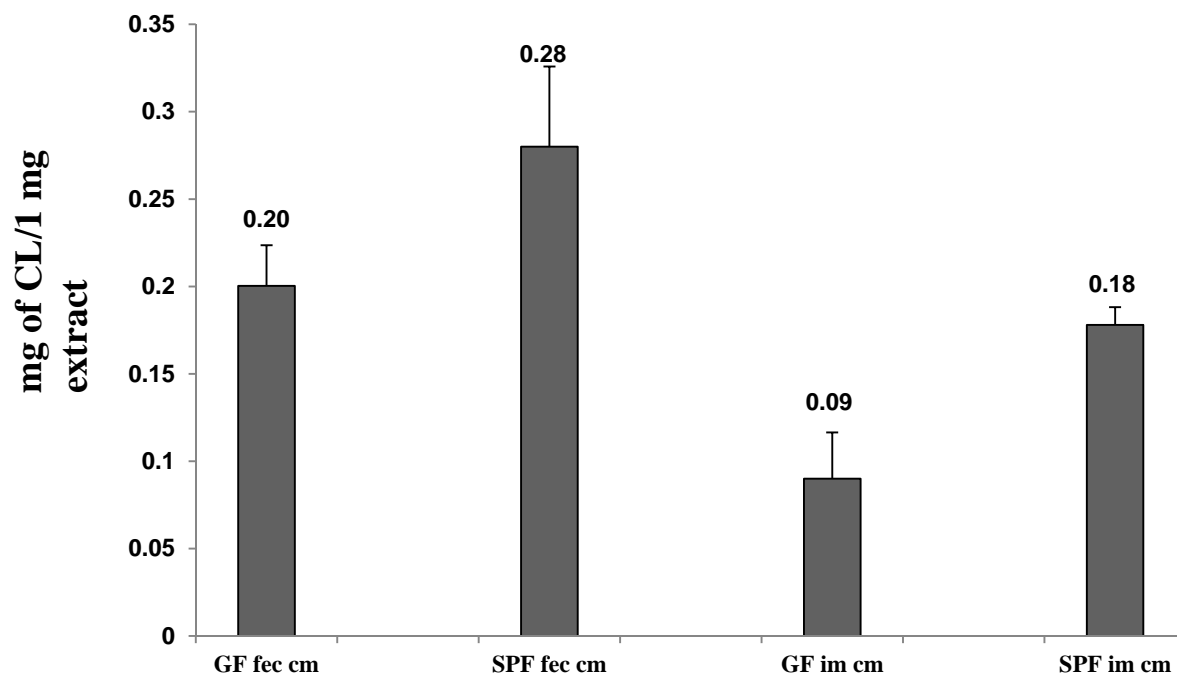

**Fig S3. Cardiolipin (CL) content of chloroform-methanol lipid extracts of GF and SPF mice feces and intestinal mucosa.** The CL content of GFfec<sub>cm</sub>, SPFfec<sub>cm</sub>, GFim<sub>cm</sub> and SPFim<sub>cm</sub> was measured fluorometrically using 10-N-nonyl-acridine orange. The results were determined by linear interpolation from the CL standard curves. The content of CL in each sample is expressed as the amount of CL (mg) in 1 mg of the total lipid extract minus the background ( $\pm$  standard deviation).

**Figure S4.**

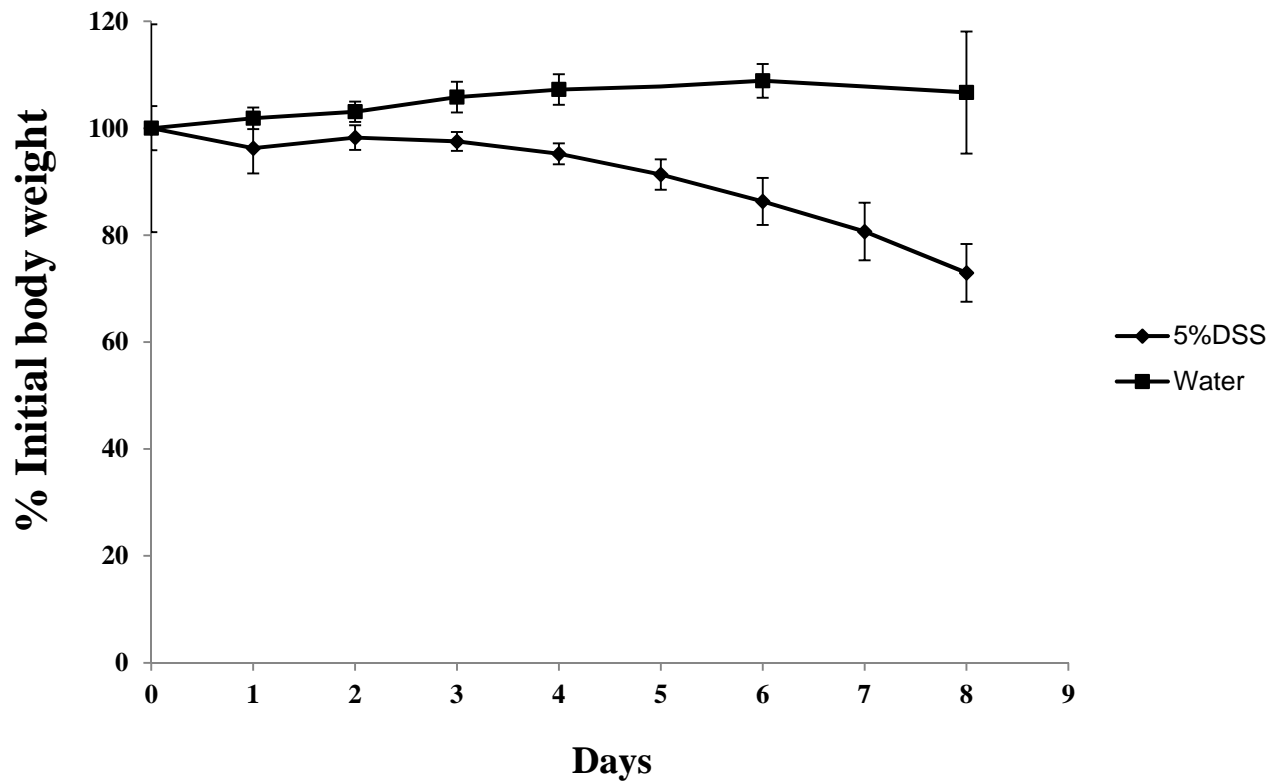

**Fig S4. Daily changes in body weight of mice administered 5% dextran sodium sulphate.** Changes in body weight of mice during DSS treatment for 7 days were measured daily and compared to that of control mice administered water (6 mice per group). Body weight change up to day 8 was expressed as a percentage ( $\pm$  standard deviation) of the weight at day 0.

**Figure S5.**

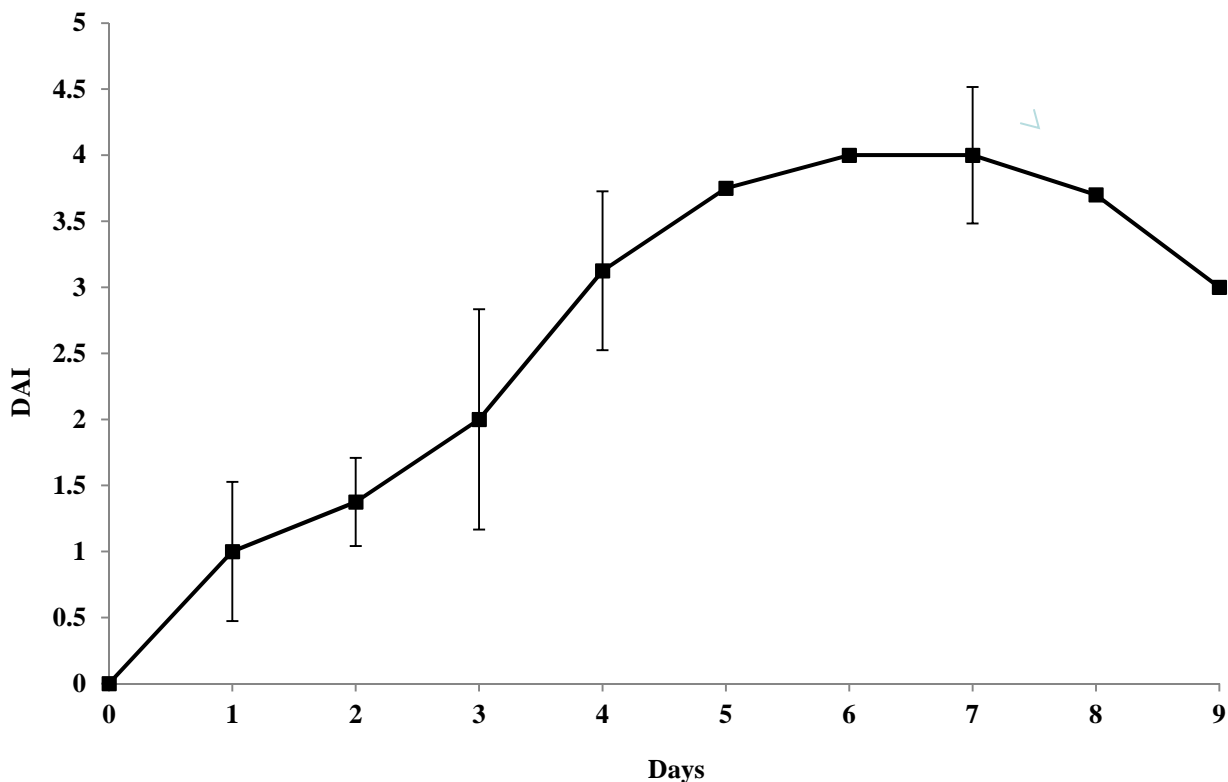

| Score | Stool consistency | Blood in stool        |
|-------|-------------------|-----------------------|
| 0     | Normal            | Negative              |
| 1     | Loose stool       | Negative              |
| 2     | Loose stool       | Positive              |
| 3     | Diarrhoea         | Positive              |
| 4     | Diarrhoea         | Gross rectal bleeding |

**Fig S5. Determination of the disease activity index (DAI) of mice administered 5% DSS.** DAI was measured for each mouse according to the scoring system outlined in the Table which was adapted from Murthy et al., Dig Dis Sci 38:1722-1734, 1993. Mice (n = 6) were given 5% DSS in drinking water for 7 days and DAI was recorded up to day 9 ( $\pm$  standard deviation).

**Figure S6.**

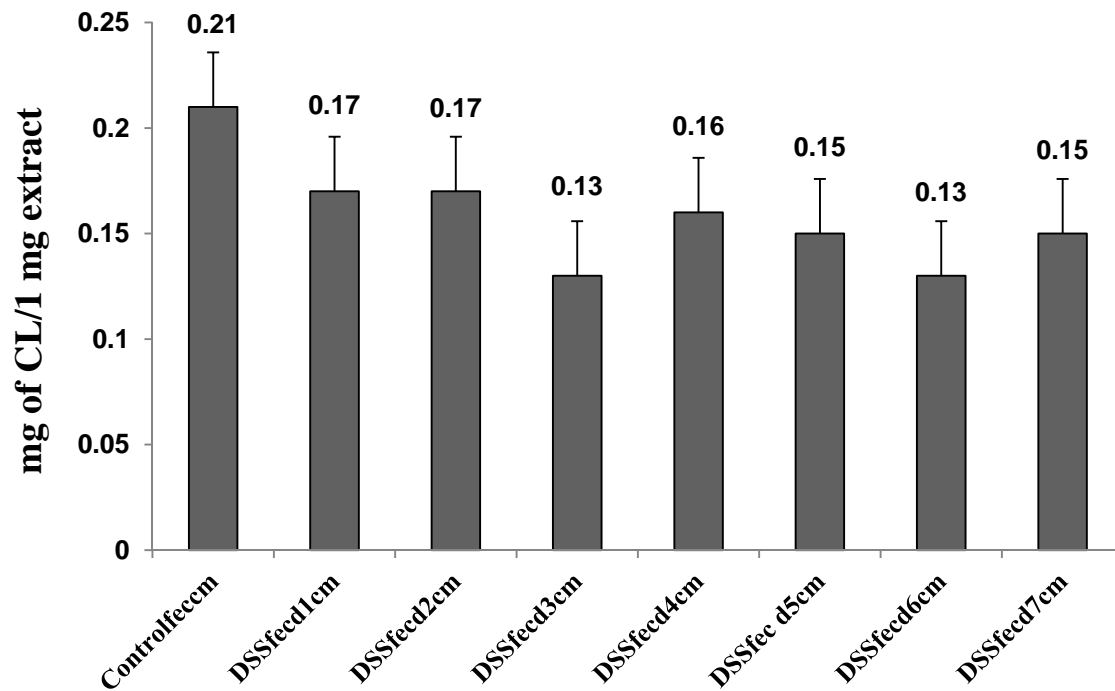

**Fig S6. Related to figure 6 and Figure S4. Similar cardiolipin content of chloroform-methanol extracts derived from the feces of DSS administered mice and from controls.** Feces were collected daily, up to day 7, from DSS administered mice and controls. The CL content in DSS fec<sub>(d1-d7)cm</sub> and control feces from water fed mice (Control fec<sub>cm</sub>) was measured fluorometrically using 10-N-nonyl-acridine orange. The results were determined by linear interpolation from CL standard curves and the content of CL in each sample is expressed as the amount of CL (mg) in 1 mg of the total lipid extract minus the background ( $\pm$  standard deviation).

Figure S7.

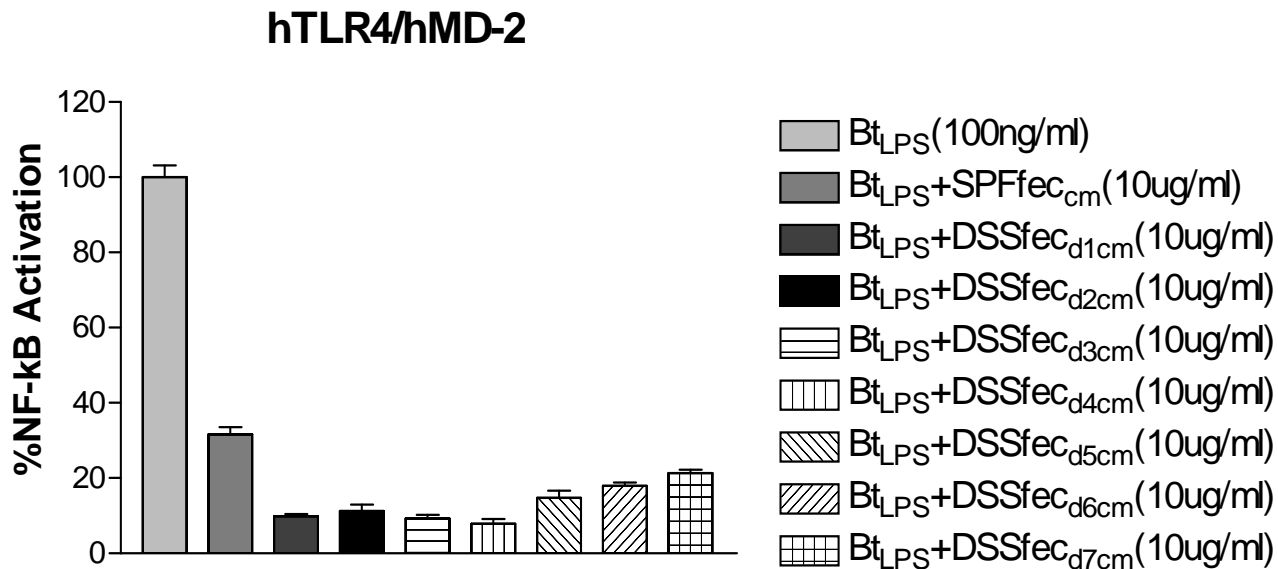

**Fig S7. Related to Figure 6. Lipid extracts derived from feces of DSS administered mice or SPF mice display similar abilities to antagonize LPS-dependent TLR4 signaling.** Recombinant TLR4 activity was measured using a HEK293 luciferase reporter assay. The relative abilities of lipid extracts from SPF mouse feces and DSS-treated mouse feces (d1-d7) to antagonize BtLPS-dependent TLR4 activation were compared. The results of agonist (BtLPS) combined with SPFfec<sub>cm</sub> or DSSfec<sub>(d1-d7)cm</sub> lipid fractions were plotted as percent activation minus the background ( $\pm$  standard deviation) of triplicate determinations relative to the Bt<sub>LPS</sub> alone minus the background which was considered to be one hundred percent activation.



**Table S1.**

|                   |                                       |                                                      |                                       |                                                                             |                                                                      |
|-------------------|---------------------------------------|------------------------------------------------------|---------------------------------------|-----------------------------------------------------------------------------|----------------------------------------------------------------------|
| <b>Fatty acid</b> | <b>C16:0,</b><br>hexadecanoic<br>acid | <b>iso-C16:0,</b><br>14-Me-<br>pentadecanoic<br>acid | <b>C18:0,</b><br>octadecanoic<br>acid | <b>C18:1,</b> 9-<br>(trans) or 9-<br>(cis)-<br>octadecenoic<br>(oleic) acid | <b>C18:2,</b><br>9,12-cis/cis-<br>octadecadienoic<br>(linoleic) acid |
| <b>Peak area</b>  | 3.8                                   | 1                                                    | traces                                | 3.8                                                                         | 3                                                                    |

**Table S1. Fatty acid composition of the purified lipid extract of feces from germ-free mice (GFfec<sub>cm</sub>) (Fraction 1, ToyoPearl HW- 40 column) determined by GC-MS.**

**Table S2.**

| Signal, $\delta_{\text{H}}$ | Proton                                                  | Compound                       |
|-----------------------------|---------------------------------------------------------|--------------------------------|
| 0.80                        | $-(\text{CH}_2)_n-\text{CH}_3$                          | all acids except linoleic acid |
| 0.93                        | $-\text{CH}=\text{CH}-\text{CH}_2\text{CH}_3$           | linoleic acid                  |
| 1.20                        | $-(\text{CH}_2)_n-$                                     | all fatty acids                |
| 1.50                        | $-\text{CH}_2-\text{CH}_2-\text{COOR}$                  | all fatty acid esters          |
| 1.94                        | $-\text{CH}_2-\text{CH}=\text{CH}-$                     | all unsaturated fatty acids    |
| 2.14                        | $-\text{CH}_2-\text{COOR}$                              | all fatty acids esters         |
| 2.68                        | $-\text{CH}=\text{CH}-\text{CH}_2-\text{CH}=\text{CH}-$ | linoleic acid                  |
| 5.25                        | $-\text{CH}=\text{CH}-$                                 | all unsaturated fatty acids    |

**Table S2. Related to Figure S2A.  $^1\text{H}$  NMR spectral data ( $\delta_{\text{H}}$ , ppm) of the purified lipid extract from GF feces (Fraction 1, ToyoPearl HW-40). The assigned protons for the fatty acid residues which are attached to the side chain glycerol moieties of the cardiolipin species are shown in bold.**
